# Supplementary material
Source: publisher site journal article supplement (https://www.dovepress.com/article/235536)
Supplement: Supplementary file 1 [file get_supplementary_file.php]

## **IN-DEPTH INTERVIEW GUIDE QUESTIONS**

### **Healthcare Provide**

1. What is your perception about oil pollution in the Niger delta?
2. Can oil pollution threaten the health of residents? If yes, how?
3. Can oil pollution threaten the health of pregnant women, if yes, how?
4. Are there any possible health risks of oil pollution in the Niger Delta? Please mention some of the possible health risks
5. Are there any possible health risks of oil pollution on women/pregnant women? Please mention some of the possible health risks
6. What do you think about the following questions in this community
  - a. Is the food safe for pregnancy?
  - b. Is the water safe for pregnancy?
  - c. Is the air safe for pregnancy?
7. Please, from your experience, what are the common adverse maternal and newborn outcomes in this community?
8. To what extent do you think that they are related to oil pollution? (Explore; Miscarriages, low birthweight, PIH, GDM, preterm, stillbirth etc.)
9. Is the health care centre well equipped with personnel and facilities to handle these health challenges?
10. What do you think are the possible solution to oil pollution in this community?
11. Would you like to add anything else that you feel might be relevant that we have not discussed?

Thank you very much for participating. The interview was a huge success. I hope you found the interview interesting

## IN-DEPTH INTERVIEW GUIDE QUESTIONS

### Women Leader

1. Can you please give me a brief history about this community
2. In your own word, what is oil pollution?
3. What do you think about oil spillages and gas flaring?
4. Are there terminology used for them, are there any differences?
5. What are the likely causes of oil spillages and gas flaring in this community?
6. Has oil spills affected any river, stream or land that is sacred to the community? If yes why is it sacred?
7. Oil production activities in the Niger Delta; is it more harmful or beneficial? Please explain your answer
8. Are there any benefits you have had as a person or household? What of the benefits to the community, that you know of or can think of?
9. Can you describe an incidence of oil pollution (oil spills or gas flaring) in this community ?( Explore; the source and type of the pollution, when it occur)
10. When was the last incident of spillage that occurred in and around this community? What action was taken by the community leaders?
11. What have been the possible reactions to oil pollution in this community? (Probe: community leaders, elders, youth reactions)
12. Please describe any effects that the environmental degradation caused by oil pollution (probe; either oil spills or gas flaring) has had on your livelihood or on someone you know
13. Can you mention some of the health risk of oil pollution in this community
14. Please, from your experience or from the experience of other women you know, what are the common adverse maternal and new-born outcomes in this community (Probe; miscarriage, preterm delivery, stillbirth, low birth weight, PIH, GDM etc.)
15. What is it that can be done to reduce the effect of oil pollution in this community? Do you think that the community have a role to play in reducing oil pollution in this community
16. What has the government or the oil companies done to reduce or mitigate the effects of oil spills and gas flaring?
17. Would you like to add anything else that you feel might be relevant that we have not discussed?

Thank you very much for participating. The interview was a huge success. I hope you found the interview interesting

## **Focus Group Discussion Guide Questions**

### **Women of Reproductive Age Guiding Questions**

1. In your perspective, what is oil pollution? (explore; what is oil spill, gas flaring)
2. What are the likely causes of oil pollution (Oil spill and gas flaring)?
3. Tell me about your experiences with oil spills or gas flaring in this community and how it has affected your health or the health of someone you know
4. How can oil pollution threaten the health of pregnant woman?
5. What do you think about the following conditions in this community
  - a. Food safety for pregnant women?
  - b. Safety of water for pregnant women?
  - c. Safety air for pregnant women?
6. Please, from your experience or from the experience of other women you know, what are the common adverse maternal and newborn outcomes in this community?  
(Probe; miscarriage, preterm delivery, stillbirth, low birth weight, PIH, GDM etc.)
7. To what extent do you think that they related to oil pollution?  
(Probe; Miscarriages, low birth weight, PIH, GDM, preterm, stillbirth etc.)
8. Please describe any health care you have sought after being affected by pollution
9. What do you think are the possible solution to oil pollution in this community?
10. What will you like to add that you feel might be relevant that we have not discussed?

Conclusion: Thank you very much for participating. The discussion was a huge success. I hope you found the interview interesting.
